# Supplementary material for: Poly(vinylidene fluoride) grafted polystyrene (PVDF-g-PS) membrane based on in situ polymerization for solvent resistant nanofiltration
Source: Royal Society of Chemistry journal article supplement (doi:10.1039/c7ra03998k), 2017-01-01
Supplement: c7ra03998k1.pdf [file c7ra03998k1.pdf]

## Poly(vinylidene fluoride) grafted polystyrene (PVDF-g-PS) membrane based on in-situ polymerization for solvent resistant nanofiltration

Fang Yuan,<sup>a</sup> Yi Yang,<sup>a</sup> Rui Wang,<sup>a</sup> Dongju Chen<sup>a\*</sup>

<sup>a</sup>School of Chemistry and Chemical Engineering, Liaoning Normal University, Huanghe Road 850, Dalian 116029 (P. R. China), E-mail: [dongju.chen@yahoo.com](mailto:dongju.chen@yahoo.com).

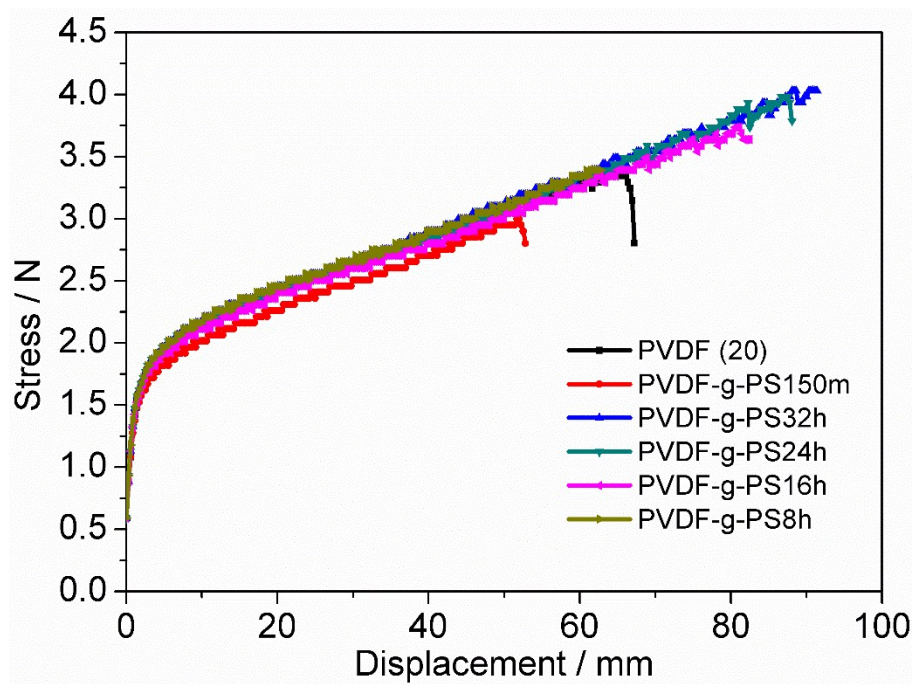

**Fig. S1** The mechanical stability of the prepared membranes.

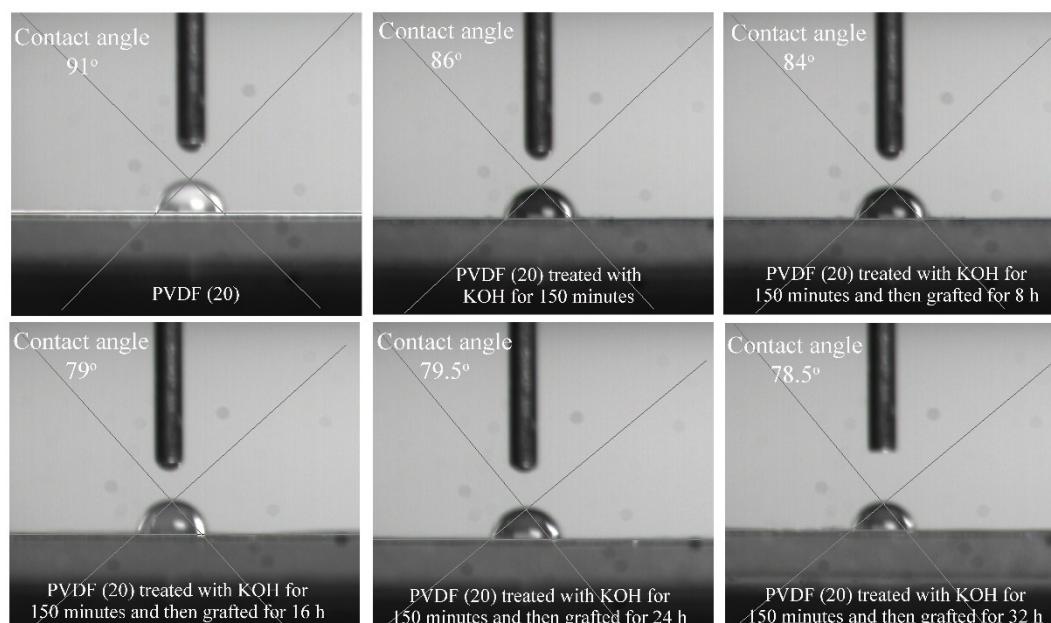

**Fig. S2** Contact angle of the prepared PVDF membranes.
